# Supplementary material
Source: HighWire-hosted journal article supplement (https://erj.ersjournals.com/content/59/5/2200700)
Supplement: inline-supplementary-material-1 [file inline-supplementary-material-1.pdf]

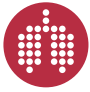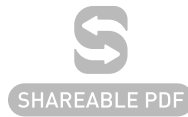

# Should we rewrite the natural history and prognosis of pulmonary Langerhans cell histiocytosis?

Sergio Harari <sup>1,2</sup> and Davide Elia<sup>1</sup>

<sup>1</sup>U.O. di Pneumologia e Terapia Semi-Intensiva Respiratoria – Servizio di Fisiopatologia Respiratoria ed Emodinamica Polmonare, MultiMedica, IRCCS, Milan, Italy. <sup>2</sup>Department of Clinical Sciences and Community Health, Università di Milano, Milan, Italy.

Corresponding author: Sergio Harari ([sergio@sergioharari.it](mailto:sergio@sergioharari.it))

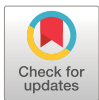

Shareable abstract (@ERSpublications)

**The natural history and clinical prognosis of PLCH have changed, since its first description. A long-term follow-up is recommended in order to prevent the development of malignancies.**

<https://bit.ly/3KmGbNo>

**Cite this article as:** Harari S, Elia D. Should we rewrite the natural history and prognosis of pulmonary Langerhans cell histiocytosis? *Eur Respir J* 2022; 59: 2200700 [DOI: 10.1183/13993003.00700-2022].

This single-page version can be shared freely online.

Copyright ©The authors 2022.  
For reproduction rights and  
permissions contact  
[permissions@ersnet.org](mailto:permissions@ersnet.org)

Received: 1 April 2022  
Accepted: 14 April 2022

Pulmonary Langerhans cell histiocytosis (PLCH) is a diffuse cystic lung disease, involving several lung structures such as bronchioles, the interstitium and pulmonary vessels, to differing extents, leading to a variety of clinical phenotypes.
